# Supplementary material for: Effective Improvement of the Accuracy of Snow Cover Discrimination Using a Random Forests Algorithm Considering Multiple Factors: A Case Study of the Three-Rivers Headwater Region, Tibet Plateau
Source: MDPI journal article supplement (doi:10.3390/rs15194644), 2023-09-22
Supplement: s1 [file s1]

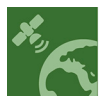

## Supplementary Materials

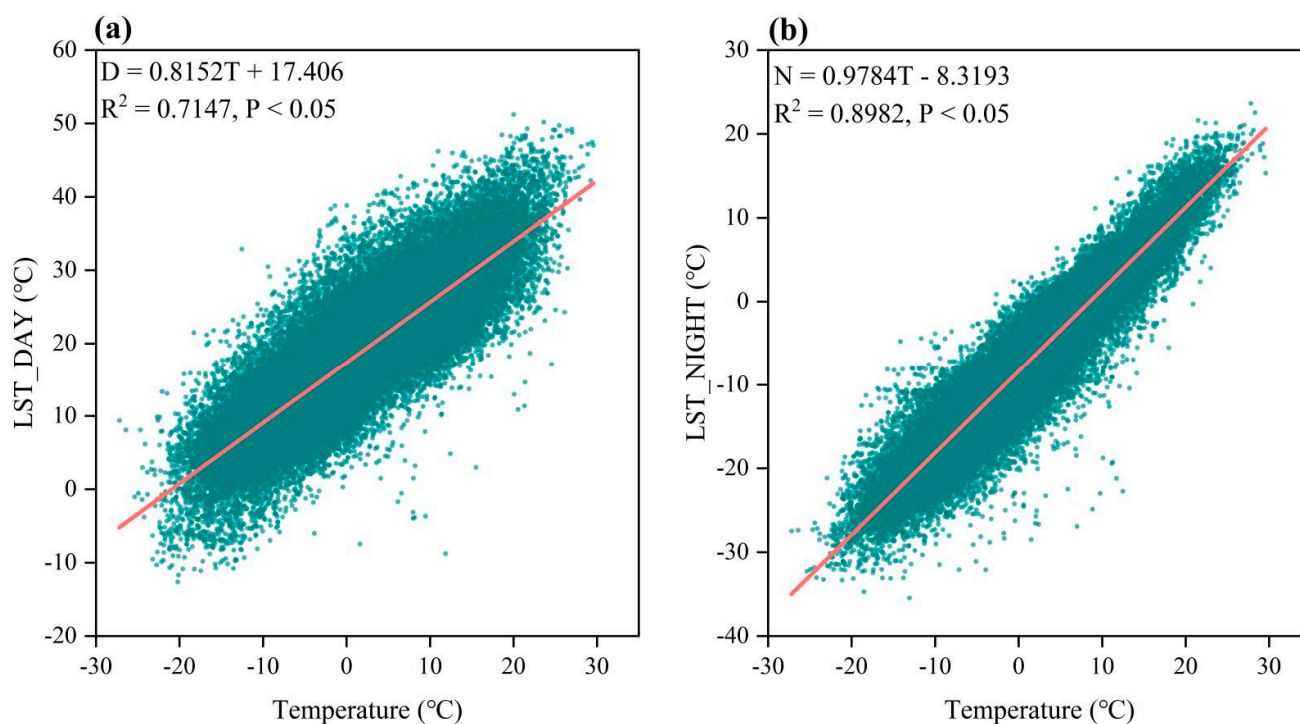

**Figure S1.** (a) The relationship between temperature and LST\_DAY. (b) The relationship between temperature and LST\_NIGHT.

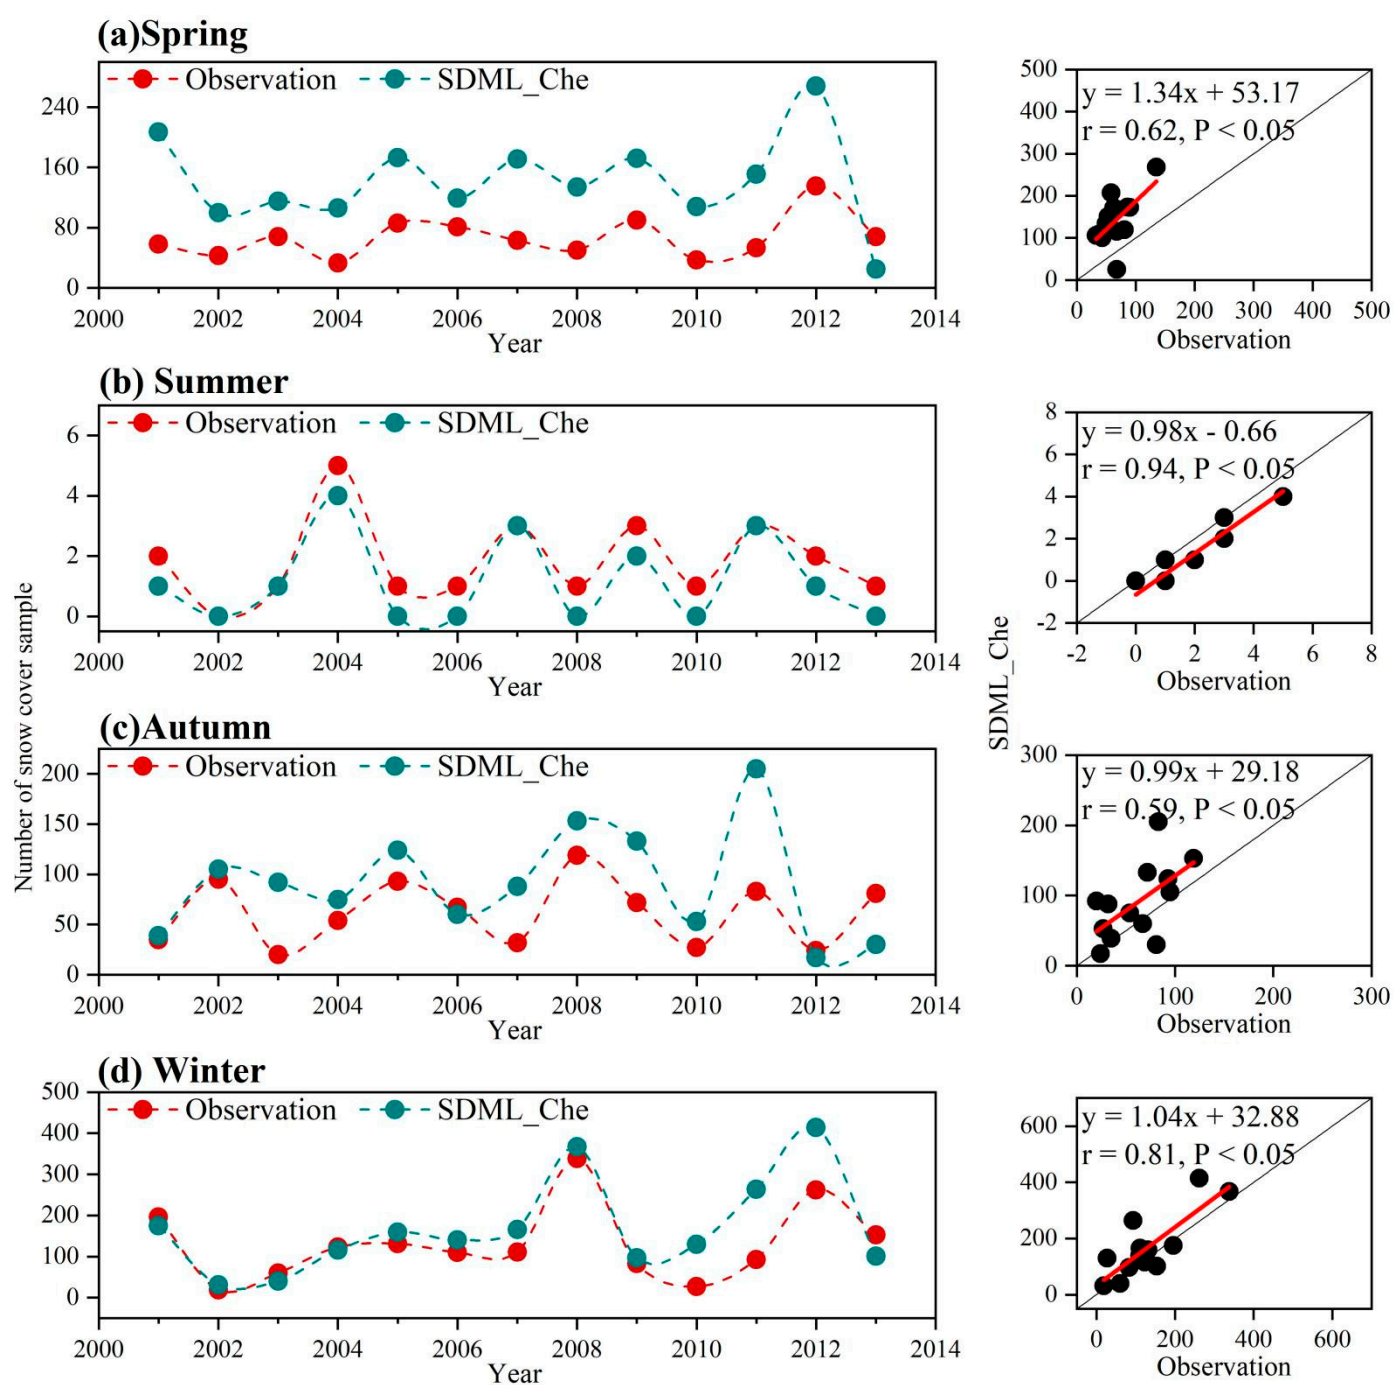

**Figure S2.** Comparison of SDML\_Che data with site observations in different seasons: (a) spring; (b) summer; (c) autumn; (d) winter.

**Table S1.** Variable selection results of 10 intermediate models.

[illegible]
